# Supplementary material for: Homo-valent diruthenium(ii,ii) carbonates Na4[Ru2(CO3)4]·10H2O: synthesis, structure, properties, and calculation
Source: Royal Society of Chemistry journal article supplement (doi:10.1039/d2dt03846c), 2022-12-26
Supplement: d2dt03846c1.pdf [file d2dt03846c1.pdf]

## Electronic Supporting Information (ESI)

### Homo-valent diruthenium(II,II) carbonates $\text{Na}_4[\text{Ru}_2(\text{CO}_3)_4]\cdot 10\text{H}_2\text{O}$ : synthesis, structure, properties, and calculation

Jing-Yu Li, Pei Zhang, Jian-Hui Yang and Bin Liu\*

Key Laboratory of Synthetic and Natural Functional Molecule of the Ministry of Education, Xi'an Key Laboratory of Functional Supramolecular Structure and Materials, College of Chemistry & Materials Science, Northwest University, Xi'an 710127, P. R. China

Table S1. Crystal data and structural refinement parameters for compound **1**

| Compound <b>1</b>                                                                  |                                                              |
|------------------------------------------------------------------------------------|--------------------------------------------------------------|
| Empirical formula                                                                  | $\text{C}_4\text{H}_{20}\text{Na}_4\text{O}_{22}\text{Ru}_2$ |
| Formula weight                                                                     | 714.30                                                       |
| Temperature (K)                                                                    | 150(2)                                                       |
| Wavelength ( $\text{\AA}$ )                                                        | 1.34139                                                      |
| Crystal system                                                                     | Monoclinic                                                   |
| Space group                                                                        | $C2/c$                                                       |
| $a$ / $\text{\AA}$                                                                 | 23.0029(12)                                                  |
| $b$ / $\text{\AA}$                                                                 | 9.0127(4)                                                    |
| $c$ / $\text{\AA}$                                                                 | 9.9585(5)                                                    |
| $\beta$ / $^\circ$                                                                 | 107.461(2)                                                   |
| $V$ / $\text{\AA}^3$                                                               | 1869.45(17)                                                  |
| $Z$                                                                                | 4                                                            |
| $\rho_{\text{calc}}$ ( $\text{g} \cdot \text{cm}^{-3}$ )                           | 2.409                                                        |
| $\mu$ ( $\text{mm}^{-1}$ )                                                         | 12.561                                                       |
| $F(000)$                                                                           | 1408                                                         |
| Reflections collected                                                              | 10766                                                        |
| Reflections unique<br>parameters                                                   | 1739<br>146                                                  |
| GOF on $F^2$                                                                       | 1.042                                                        |
| $R_{\text{int}}$                                                                   | 0.055                                                        |
| $R_1, wR_2^a [I > 2\sigma(I)]$                                                     | 0.0530, 0.1422                                               |
| $R_1, wR_2^a$ (all data)                                                           | 0.0555, 0.1442                                               |
| $(\Delta\rho)_{\text{max}}, (\Delta\rho)_{\text{min}}$ [ $\text{e}/\text{\AA}^3$ ] | 2.486, -1.404                                                |

$$[\text{a}] R_1 = \frac{\sum ||F_o| - |F_c||}{\sum |F_o|}; wR_2 = \left[ \frac{\sum w(F_o^2 - F_c^2)^2}{\sum w(F_o^2)^2} \right]^{1/2}$$

\* Corresponding author. Tel./fax: +86-029-81535026.

E-mail address: [liubin@nwu.edu.cn](mailto:liubin@nwu.edu.cn) (B. Liu).

Table S2. Selected bond distances (Å) for compound **1**

| Selected bond distances (Å) |           |             |          |             |           |
|-----------------------------|-----------|-------------|----------|-------------|-----------|
| Ru(1)–Ru(1k)                | 2.2572(7) | Na(1)–O(6)  | 2.351(5) | Na(2)–O(8)  | 2.412(7)  |
| Ru(1)–O(1k)                 | 2.077(5)  | Na(1)–O(7)  | 2.372(6) | Na(2)–O(9)  | 2.373(11) |
| Ru(1)–O(2)                  | 2.082(5)  | Na(1)–O(8)  | 2.360(6) | Na(2)–O(10) | 2.529(13) |
| Ru(1)–O(4)                  | 2.073(5)  | Na(1)–O(2a) | 2.446(5) | Na(2)–O(11) | 2.332(11) |
| Ru(1)–O(5k)                 | 2.086(5)  | Na(1)–O(4h) | 2.331(6) | Na(2)–O(3f) | 2.586(8)  |
| Ru(1)–O(6i)                 | 2.323(5)  | Na(1)–O(5j) | 2.470(6) | Na(2)–O(9c) | 2.487(14) |
| C(1)–O(1)                   | 1.306(9)  | C(1)–O(2)   | 1.290(9) | C(1)–O(3)   | 1.272(10) |
| C(2)–O(4)                   | 1.285(9)  | C(2)–O(5)   | 1.306(8) | C(2)–O(6)   | 1.261(8)  |

Table S3. Selected angles (°) for compound **1**

|                    |            |                   |            |
|--------------------|------------|-------------------|------------|
| Ru(1k)–Ru(1)–O(2)  | 89.85(13)  | Ru(1k)–O(1)–C(1)  | 119.6(4)   |
| Ru(1k)–Ru(1)–O(4)  | 89.21(14)  | Ru(1k)–O(5)–C(2)  | 118.7(4)   |
| Ru(1k)–Ru(1)–O(1k) | 89.97(14)  | Ru(1h)–O(6)–C(2)  | 126.1(4)   |
| Ru(1k)–Ru(1)–O(5k) | 90.41(13)  | Ru(1)–O(2)–C(1)   | 119.9(4)   |
| Ru(1k)–Ru(1)–O(6i) | 172.61(12) | Ru(1)–O(4)–C(2)   | 121.2(4)   |
| O(2)–Ru(1)–O(4)    | 87.62(19)  | O(1k)–Ru(1)–O(4)  | 92.5(2)    |
| O(2)–Ru(1)–O(6i)   | 89.96(18)  | O(4)–Ru(1)–O(5k)  | 178.48(19) |
| O(1k)–Ru(1)–O(2)   | 179.8(2)   | O(1k)–Ru(1)–O(6i) | 90.23(18)  |
| O(2)–Ru(1)–O(5k)   | 90.90(18)  | O(5k)–Ru(1)–O(6i) | 96.99(17)  |
| O(4)–Ru(1)–O(6i)   | 83.40(18)  | O(1k)–Ru(1)–O(5k) | 89.0(2)    |
| O(2)–C(1)–O(3)     | 119.4(7)   | O(4)–C(2)–O(6)    | 121.4(6)   |
| O(1)–C(1)–O(2)     | 120.2(6)   | O(5)–C(2)–O(6)    | 118.6(6)   |
| O(1)–C(1)–O(3)     | 120.4(7)   | O(4)–C(2)–O(5)    | 120.0(6)   |
| O(6)–Na(1)–O(7)    | 87.8(2)    | O(8)–Na(2)–O(9)   | 75.5(4)    |
| O(6)–Na(1)–O(8)    | 86.4(2)    | O(8)–Na(2)–O(10)  | 102.6(3)   |
| O(2a)–Na(1)–O(6)   | 155.4(2)   | O(8)–Na(2)–O(11)  | 87.9(3)    |
| O(4h)–Na(1)–O(6)   | 77.5(2)    | O(8)–Na(2)–O(9c)  | 163.2(3)   |
| O(5j)–Na(1)–O(6)   | 119.8(2)   | O(3f)–Na(2)–O(8)  | 96.5(3)    |
| O(7)–Na(1)–O(8)    | 90.3(2)    | O(9)–Na(2)–O(10)  | 79.3(3)    |
| O(2a)–Na(1)–O(7)   | 79.21(19)  | O(9)–Na(2)–O(11)  | 89.1(4)    |
| O(4h)–Na(1)–O(7)   | 101.4(2)   | O(9)–Na(2)–O(9c)  | 88.1(4)    |
| O(5j)–Na(1)–O(7)   | 152.4(2)   | O(3f)–Na(2)–O(9)  | 170.3(4)   |
| O(2a)–Na(1)–O(8)   | 114.2(2)   | O(10)–Na(2)–O(11) | 161.8(4)   |
| O(4h)–Na(1)–O(8)   | 159.6(2)   | O(9c)–Na(2)–O(10) | 77.2(3)    |
| O(5j)–Na(1)–O(8)   | 93.2(2)    | O(3f)–Na(2)–O(10) | 97.4(3)    |
| O(2a)–Na(1)–O(4h)  | 84.62(19)  | O(9c)–Na(2)–O(11) | 88.4(4)    |
| O(2a)–Na(1)–O(5j)  | 74.34(17)  | O(3f)–Na(2)–O(11) | 96.2(3)    |

O(4h)–Na(1)–O(5j)      84.17(19)      O(3f)–Na(2)–O(9c)      100.2(3)

Symmetry codes: a x,-1+y,z; b x,1+y,z; c 1-x,y,3/2-z; d -x,1-y,-z; e x,1-y,-1/2+z; f x,1-y,1/2+z; g -1/2+x,1/2+y,z; h  
1/2-x,-1/2+y,1/2-z; i 1/2-x,1/2+y,1/2-z; j 1/2-x,1/2-y,1-z; k 1/2-x,3/2-y,1-z.

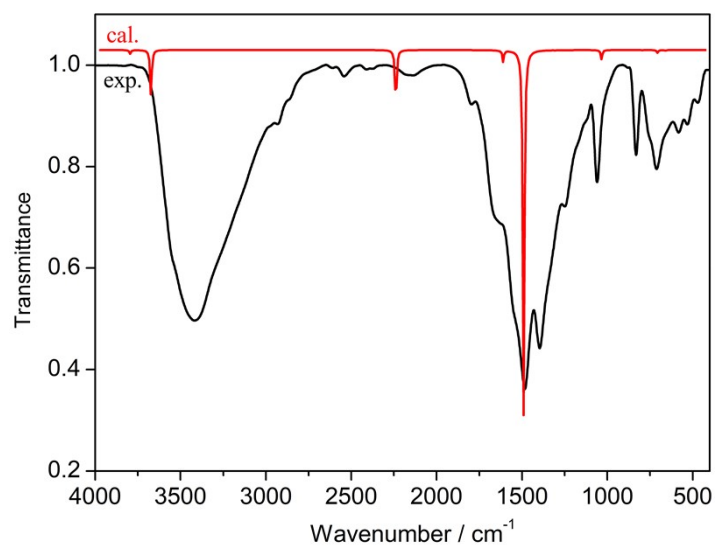

**Fig. S1** IR spectrum of compound **1**.

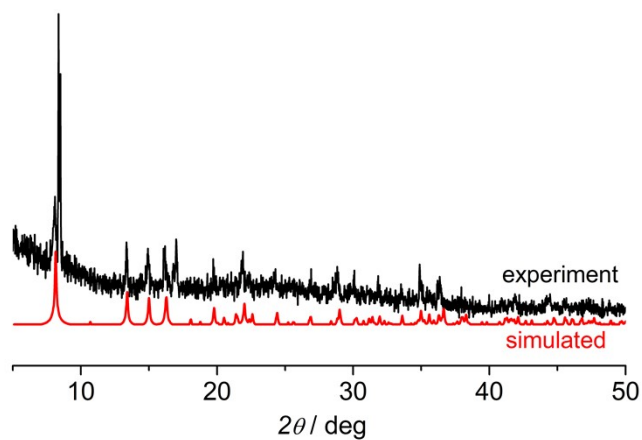

**Fig. S2** Comparison of XRPD patterns of the simulated pattern from the single-crystal structure determination and the as-synthesized bulk samples of **1**.

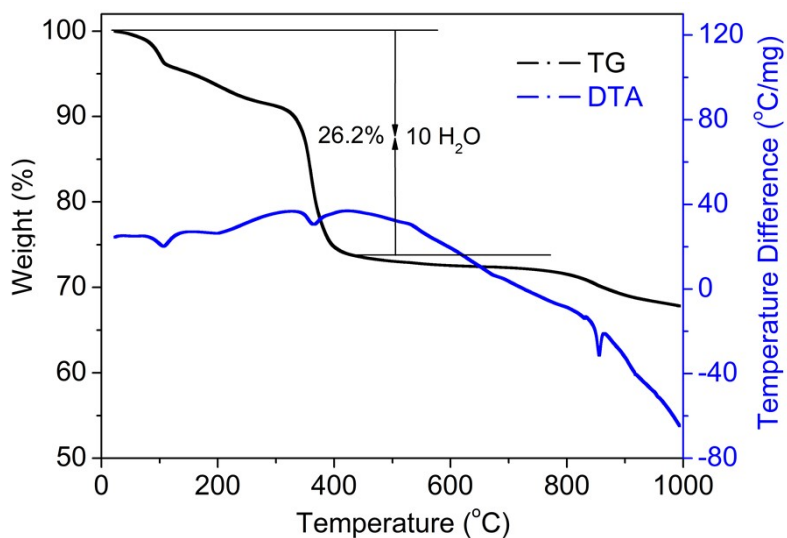

**Fig. S3** TG curve of compound **1**.

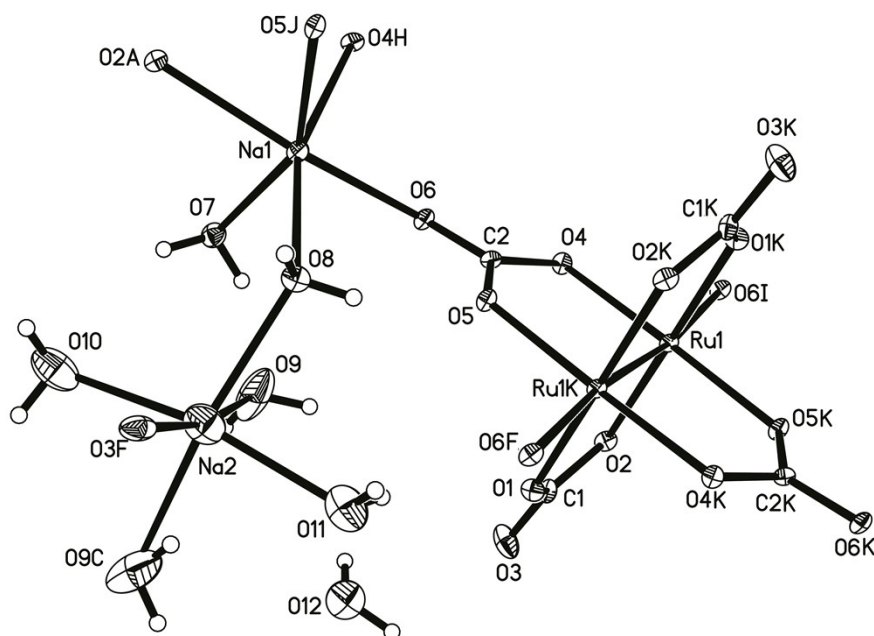

**Fig. S4** ORTEP representation (30% thermal probability ellipsoids) of the crystal structure of **1**.

Table S4. Selected bond distances (Å) from the experiment and calculation.

|              | Exp.      | Calc.   |           | Exp.      | Calc.   |
|--------------|-----------|---------|-----------|-----------|---------|
| Ru(1)–Ru(1K) | 2.2572(7) | 2.26366 | C(1)–O(1) | 1.306(9)  | 1.31183 |
| Ru(1)–O(4)   | 2.073(5)  | 2.10847 | C(1)–O(2) | 1.290(9)  | 1.31183 |
| Ru(1)–O(2)   | 2.082(5)  | 2.10847 | C(1)–O(3) | 1.272(10) | 1.27212 |
| Ru(1)–O(5A)  | 2.086(5)  | 2.10680 | C(2)–O(4) | 1.285(9)  | 1.31252 |
| Ru(1)–O(1K)  | 2.077(5)  | 2.10680 | C(2)–O(5) | 1.306(8)  | 1.31252 |
| Ru(1)–O(6I)  | 2.323(5)  | 2.55332 | C(2)–O(6) | 1.261(8)  | 1.27154 |

Table S5. Selected frontier orbital data for the model anion  $[\text{Ru}_2(\text{CO}_3)_4(\text{H}_2\text{O})_2]^{4-}$  derived from the open-shell electronic structure DFT calculation in vacuum.

| $\alpha$ |                         |            | $\beta$ |                         |            |
|----------|-------------------------|------------|---------|-------------------------|------------|
|          | Orbital                 | Energy(eV) |         | Orbital                 | Energy(eV) |
| 90       | $\sigma^*(\text{LUMO})$ | -0.41104   | 91      | $\sigma^*$              | -0.31866   |
| 89       | $\delta^*(\text{HOMO})$ | -3.73671   | 89      | $\pi^*$                 | -0.88642   |
| 88       | $\pi^*$                 | -4.03267   | 88      | $\pi^*(\text{LUMO})$    | -0.95367   |
| 87       | $\pi^*$                 | -4.07975   | 87      | $\delta^*(\text{HOMO})$ | -3.31065   |
| 86       | $\delta$                | -4.47398   | 86      | $\delta$                | -4.10503   |
| 80       | $\pi$                   | -6.37308   | 85      | $\pi$                   | -4.89803   |
| 79       | $\pi$                   | -6.41177   | 84      | $\pi$                   | -4.9459    |
| 77       | $\sigma$                | -6.47309   | 80      | $\sigma$                | -6.1597    |

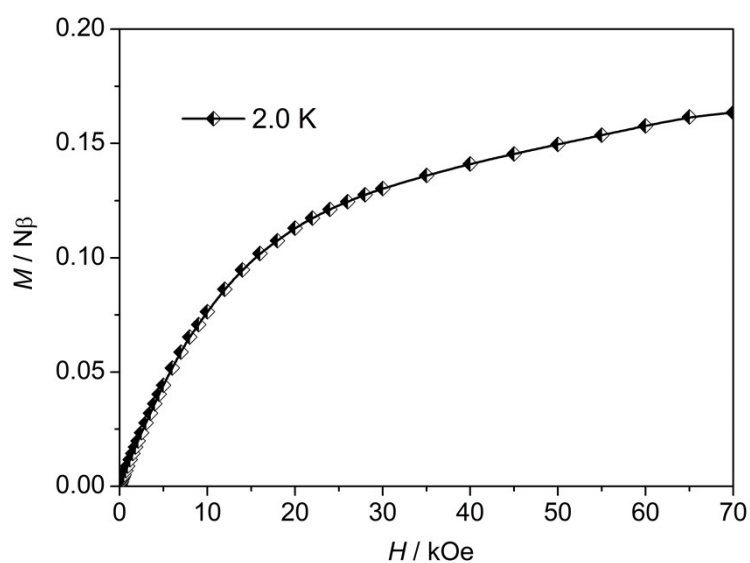

Fig. S5.  $M$  versus  $H$  data of compound 1.

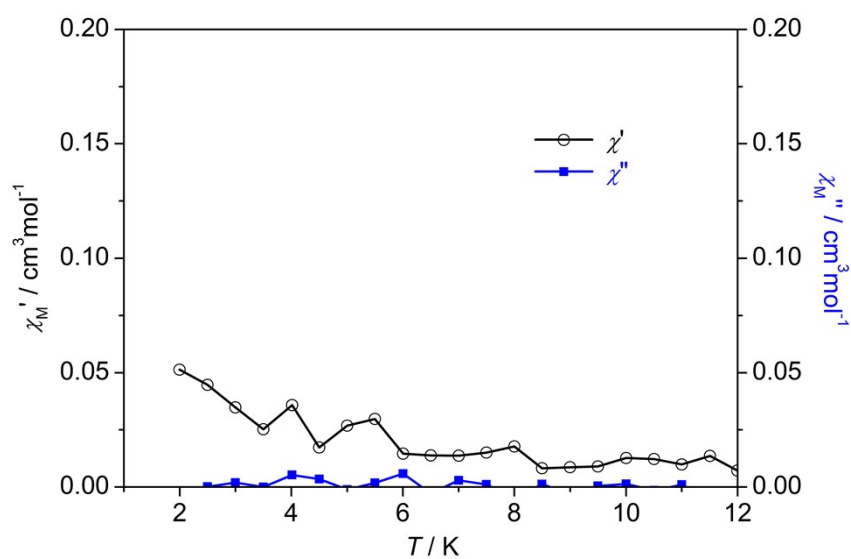

Table S6. The calculated vibration frequency corresponds to the Raman Activity

| Freq   | Raman Activity | Freq    | Raman Activity |
|--------|----------------|---------|----------------|
| 68.10  | 1991.7323      | 689.60  | 57.4805        |
| 80.06  | 44.7549        | 698.94  | 582.2816       |
| 126.39 | 38224.8266     | 712.07  | 18.6536        |
| 153.85 | 443.7272       | 714.18  | 5.6683         |
| 155.09 | 369.5587       | 807.42  | 6.2210         |
| 199.66 | 125.8802       | 829.52  | 3.2284         |
| 205.41 | 853.2098       | 1053.30 | 15.0955        |
| 245.79 | 45.3903        | 1057.90 | 48.3333        |
| 254.94 | 74.7289        | 1300.31 | 2960.5491      |
| 281.12 | 91.2578        | 1301.20 | 4606.7600      |
| 292.58 | 798.5226       | 1509.47 | 73.4025        |
| 301.01 | 522.1881       | 1552.69 | 582.7461       |
| 306.85 | 302.9056       | 1637.71 | 2518.6907      |
| 378.52 | 1974.9080      |         |                |

Table S7. The calculated vibration frequency corresponds to the Infrared Absorption

| <b>Freq</b> | <b>Infrared</b> | <b>Freq</b> | <b>Infrared</b> |
|-------------|-----------------|-------------|-----------------|
| 231.98      | 15.5692         | 816.11      | 1.1397          |
| 241.40      | 20.9410         | 1056.53     | 42.8631         |
| 243.00      | 6.3062          | 1057.29     | 41.1559         |
| 243.72      | 10.6011         | 1513.08     | 1742.7237       |
| 347.16      | 84.1287         | 1514.33     | 1636.4498       |
| 354.47      | 91.9147         | 1634.45     | 98.8444         |
| 403.92      | 5.1138          | 2264.63     | 541.1406        |
| 682.95      | 1.8426          | 3701.58     | 429.5674        |
| 684.26      | 2.7051          | 3824.45     | 33.6617         |
| 728.47      | 24.5336         |             |                 |

Table S8. The representative calculated optical transitions for anion  $\text{Ru}_2(\text{CO}_3)_4(\text{H}_2\text{O})_2^{4-}$ .

| $\lambda(\text{nm})$ | f      | assign.                                      | %  |
|----------------------|--------|----------------------------------------------|----|
| 484.99               | 0.0122 | $\pi \rightarrow \pi^*$                      | 40 |
| 319.23               | 0.0022 | $\pi^* \rightarrow \text{P}_{\text{C,O}}$    | 96 |
| 318.47               | 0.0011 | $\pi^* \rightarrow \text{P}_{\text{C,O}}$    | 96 |
| 314.92               | 0.0014 | $\delta \rightarrow \text{P}_{\text{C,O}}$   | 92 |
| 311.71               | 0.0014 | $\delta \rightarrow \text{P}_{\text{C,O}}$   | 84 |
| 279.73               | 0.0127 | $\text{P}_{\text{C,O}} \rightarrow \sigma^*$ | 82 |
| 268.26               | 0.0057 | $\text{P}_{\text{C,O}} \rightarrow \sigma^*$ | 93 |
| 267.31               | 0.0045 | $\text{P}_{\text{C,O}} \rightarrow \sigma^*$ | 93 |
| 261.10               | 0.0015 | $\pi^* \rightarrow \sigma^*$                 | 92 |
| 244.06               | 0.0111 | $\text{P}_{\text{C,O}} \rightarrow \sigma^*$ | 82 |
| 243.26               | 0.0110 | $\text{P}_{\text{C,O}} \rightarrow \sigma^*$ | 81 |
| 233.66               | 0.0081 | $\text{P}_{\text{C,O}} \rightarrow \pi^*$    | 86 |
| 233.01               | 0.0040 | $\text{P}_{\text{C,O}} \rightarrow \sigma^*$ | 68 |
| 232.04               | 0.0958 | $\sigma \rightarrow \sigma^*$                | 64 |
